# Supplementary material
Source: PubMed Central journal article supplement (PMC4282941)
Supplement: NIHMS647526-supplement-Suppl__1.pdf [file NIHMS647526-supplement-Suppl__1.pdf]

Table S1: Comparison of model size, FEA computation time and model generation time between PR model and voxel model.

|                                      | PT                  |                | FN                    |                 | GT                    |                | Pooled                |                 |
|--------------------------------------|---------------------|----------------|-----------------------|-----------------|-----------------------|----------------|-----------------------|-----------------|
|                                      | Voxel model         | PR model       | Voxel model           | PR model        | Voxel model           | PR model       | Voxel model           | PR model        |
| # Element                            | 1,822,600 ± 509,703 | 26,219 ± 6,704 | 3,257,231 ± 1,777,522 | 51,114 ± 16,888 | 3,182,186 ± 2,440,628 | 22,975 ± 8,647 | 2,728,837 ± 1,847,899 | 32,999 ± 16,788 |
| CPU Time for nonlinear FEA (Minutes) | 2,546.99 ± 622.60   | 11.39 ± 10.10  | 4,990.58 ± 4,290.19   | 16.11 ± 18.57   | 3,825.85 ± 2,374.51   | 7.46 ± 4.64    | 3,744.94 ± 2,923.14   | 11.57 ± 12.59   |
| Model Generation Time (Minutes)      | 0.5 ± 0.2           | 5.29 ± 1.11    | 1.0 ± 0.6             | 6.35 ± 1.29     | 0.4 ± 0.15            | 6.00 ± 1.29    | 0.6 ± 0.3             | 5.87 ± 1.29     |
